# Supplementary material for: Comparability of 11 different equations for estimating LDL cholesterol on different analysers
Source: publisher site journal article supplement (doi:10.1515/cclm-2021-0747), 2021-08-12
Supplement: Supplementary file 1 [file j_cclm-2021-0747_suppl_006.docx]

|  | **Abbott** | **Roche Cobas** |
| --- | --- | --- |
| **Direct LDL-C (mmol/L)** | 2.71 (1.34 – 4.85) | 2.59 (1.19 – 4.56) |
| **Total Cholesterol (mmol/L)** | 4.54 (2.92 – 6.99) | 4.28 (2.59 – 6.49) |
| **Triglyceride (mmol/L)** | 1.34 (0.59 – 3.58) | 1.16 (0.45 – 3.39) |
| **HDL-C (mmol/L)** | 1.2 (0.75 – 1.94) | 1.27 (0.65 – 2.17) |

**Supplementary Table 2** : Median Lipogram results from Abbott and Roche Cobas analysers
