# Supplementary material for: Comparability of 11 different equations for estimating LDL cholesterol on different analysers
Source: publisher site journal article supplement (doi:10.1515/cclm-2021-0747), 2021-08-12
Supplement: Supplementary file 1 [file j_cclm-2021-0747_suppl_013.docx]

**Supplementary Table legends**

**Supplementary Table 1:** The outpatient clinics represented in this study.

**Supplementary Table 2:** Median lipogram results analysed on Abbott Architect and Roche Cobas analysers.

**Supplementary Table 3:** Bias and regression parameters relative to direct LDL-C by platform.

**Supplementary Table 4:** Median bias between Martin/Hopkins, Sampson and Friedewald LDL-C by platform**.**

**Supplementary Table 5:** Regression parameters for Martin-Sampson-Friedewald.

**Supplementary Table 6:** Median bias across TG levels in subjects with LDL-C ≤ 1.8 mmol/L (70 mg/dL).

**Supplementary Table 7:** Pre- and post-adjustment performance of the equations.

**Supplementary Table 8:** Sensitivity and specificity at different LDL-C decision limits.

**Supplementary Figure legends**

**Supplementary Figure 1:** Bland Altman plot of the bias between direct LDL-C and Martin/Hopkins, Sampson and Friedewald LDL-C.

**Supplementary Figure 2:** Pre- (A) and post- (B) adjustment performance of selected equations.

**Supplementary Figure 3:** Summary ROC graph of the Friedewald, Martin/Hopkins, Sampson, Puavilai and Vujovic equations relative to direct LDL-C on Abbott Architect.

**Supplementary Figure 4:** Summary ROC graph of the Friedewald, Martin/Hopkins, Sampson, Puavilai and Vujovic equations relative to direct LDL-C on Roche Cobas.
